# Supplementary material
Source: publisher site journal article supplement (https://www.dovepress.com/article/227823)
Supplement: Supplementary file 1 [file get_supplementary_file.php]

**Supplementary data**

**Figure S1** Time-series concentrations of air pollutants in Taipei City and Hualien, Taitung, and Pingtung Counties in the period 2006 – 2016. (A – D) NO2, (E – H) NOX, (I – L) CO, (M – P) PM2.5, and (Q – T) PM10

**Figure S2** Exposure-response data on the relationships between ambient air pollutant concentrations and hazard ratios (HRs) of active TB adopted from Lai et al. (2016). (A) NO2, (B) NOX, (C) CO, (D) PM2.5, and (E) PM10

**Table S1** Incidence rates in the regions of Taiwan during the period from 2006 to 2016

**Table S2** Probability distributions of air pollutant concentrations (LN(gm, gsd) denotes the lognormal distribution with a geometric mean (gm) and a geometric standard deviation (gsd))

**Figure S1**


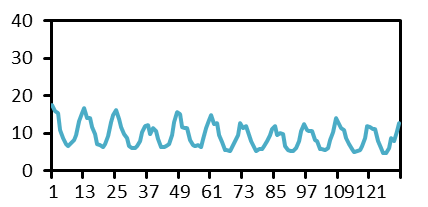

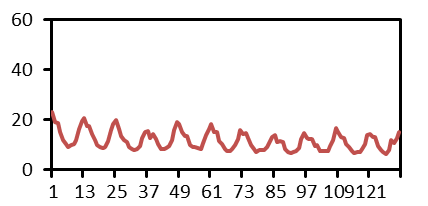

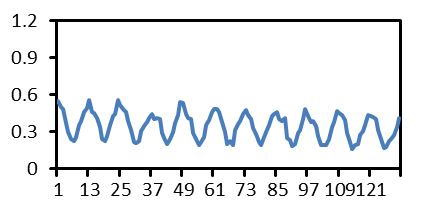

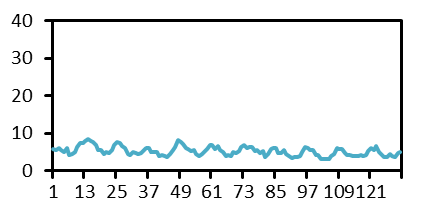

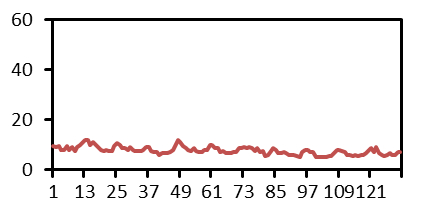

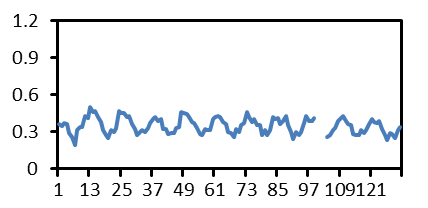

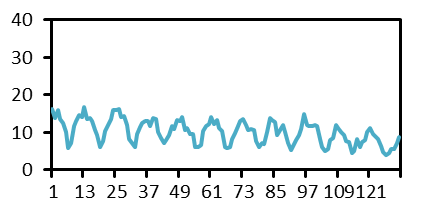

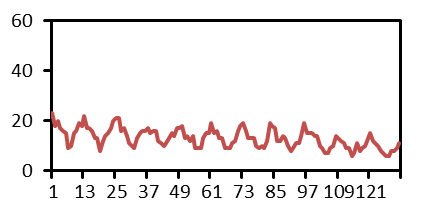

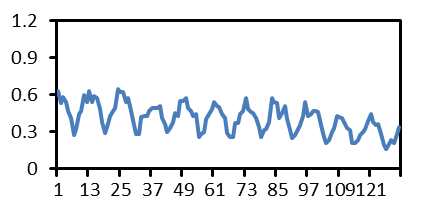

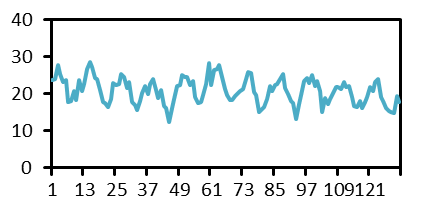

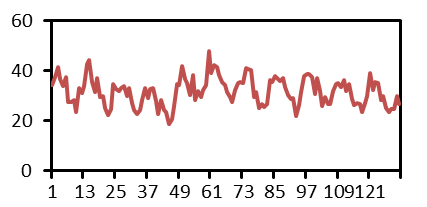

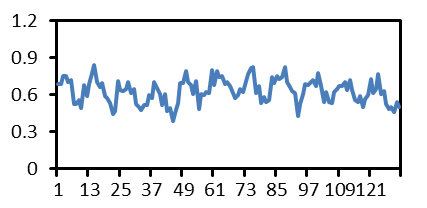


**Taipei City**

**Hualien County**

**Taitung County**

**Pingtung County**

**NO2 (ppb)**

**NOX (ppb)**

**CO(ppm)**

**Concentration**

**Time (year)**

**A**

**E**

**I**

**B**

**F**

**J**

**C**

**G**

**K**

**D**

**H**

**L**


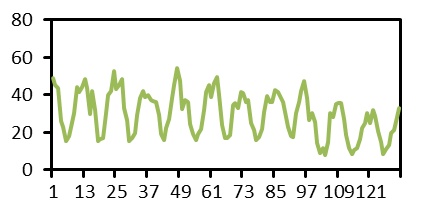

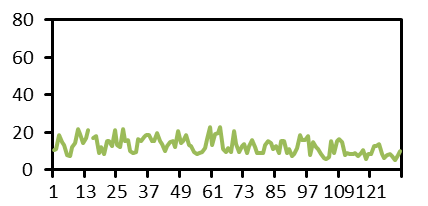


**O**

**P**


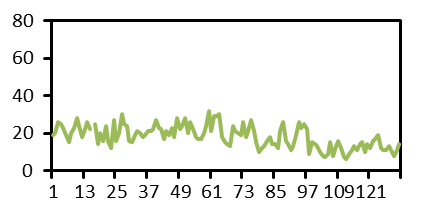


**N**


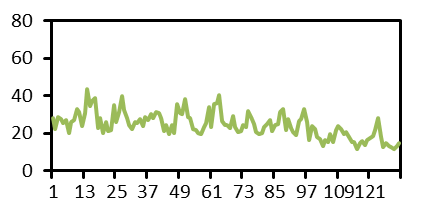


**PM2.5 (μg/m3)**

**M**


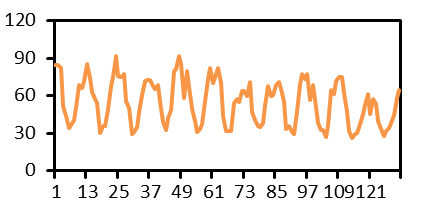

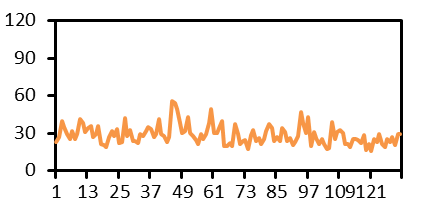

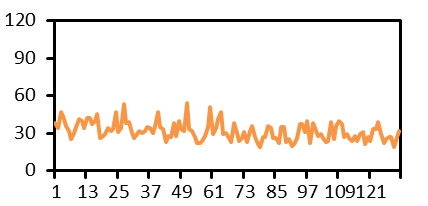

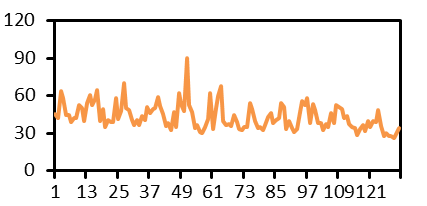


**PM10 (μg/m3)**

**Q**

**R**

**S**

**T**

**2006**

**2008**

**2010**

**2012**

**2014**

**2016**

**2006**

**2008**

**2010**

**2012**

**2014**

**2016**

**2006**

**2008**

**2010**

**2012**

**2014**

**2016**

**2006**

**2008**

**2010**

**2012**

**2014**

**2016**

**Figure S2**

**95% upper confidence limit**

**Regression model predicted**

**95% lower confidence limit**

**A**

**B**

**PM2.5 concentration (μg/m3)**

**PM10 concentration (μg/m3)**

**NO2 concentration (ppb)**

**NOX concentration (ppb)**

**CO concentration (ppm)**

**Hazard ratio (HR) of active TB**

**C**

**D**

**E**

**Table S1** Incidence rates in the regions of Taiwan during the period from 2006 to 2016

| **Region** | **Incidence rate (per 100,000 populations)** | | | | | | | | | | | **Average incidence (per 100,000 populations)** |
| --- | --- | --- | --- | --- | --- | --- | --- | --- | --- | --- | --- | --- |
| **2006** | **2007** | **2008** | **2009** | **2010** | **2011** | **2012** | **2013** | **2014** | **2015** | **2016** |
| **Taipei City** | **47** | **49** | **45** | **42** | **41** | **38** | **35** | **33** | **34** | **30** | **30** | **38.6** **± 6.8** |
| New Taipei City | 58 | 60 | 56 | 55 | 53 | 51 | 49 | 48 | 45 | 42 | 39 | 50.7 ± 6.7 |
| Keelung City | 80 | 74 | 69 | 54 | 66 | 58 | 60 | 59 | 47 | 47 | 46 | 60.0 ± 11.2 |
| Yilan County | 75 | 76 | 78 | 61 | 60 | 59 | 55 | 56 | 56 | 54 | 43 | 61.2 ± 10.8 |
| Taoyuan City | 57 | 55 | 52 | 47 | 47 | 44 | 44 | 40 | 41 | 39 | 33 | 45.3 ± 7.3 |
| Hsinchu City | 50 | 46 | 33 | 36 | 37 | 31 | 29 | 35 | 32 | 28 | 27 | 34.9 ± 7.2 |
| Hsinchu County | 59 | 48 | 39 | 47 | 44 | 40 | 34 | 35 | 36 | 36 | 33 | 41.0 ± 8.0 |
| Miaoli County | 53 | 40 | 45 | 42 | 39 | 33 | 38 | 32 | 33 | 34 | 32 | 38.2 ± 6.6 |
| Taichung City | 57 | 52 | 55 | 49 | 50 | 46 | 44 | 41 | 41 | 39 | 41 | 46.8 ± 6.3 |
| Changhwa County | 71 | 71 | 73 | 68 | 61 | 60 | 59 | 54 | 55 | 52 | 49 | 61.2 ± 8.3 |
| Nantou County | 81 | 79 | 72 | 75 | 74 | 79 | 77 | 64 | 64 | 59 | 64 | 71.6 ± 7.4 |
| Yunlin County | 86 | 75 | 80 | 79 | 75 | 70 | 70 | 66 | 70 | 63 | 61 | 72.4 ± 7.5 |
| Tainan City | 67 | 61 | 66 | 57 | 55 | 52 | 49 | 48 | 47 | 47 | 46 | 54.2 ± 7.7 |
| Chiayi City | 50 | 62 | 53 | 49 | 53 | 46 | 47 | 49 | 47 | 36 | 43 | 48.7 ± 6.5 |
| Chiayi County | 71 | 66 | 66 | 61 | 60 | 69 | 63 | 56 | 52 | 47 | 48 | 60.0 ± 8.1 |
| Kaohsiung City | 89 | 78 | 75 | 69 | 73 | 70 | 72 | 64 | 63 | 61 | 56 | 70.1 ± 9.1 |
| **Pingtung County** | **110** | **95** | **100** | **90** | **94** | **97** | **95** | **86** | **78** | **71** | **77** | **90.3 ± 11.5** |
| **Taitung County** | **105** | **92** | **100** | **113** | **100** | **97** | **81** | **77** | **79** | **70** | **66** | **89.1 ± 15.3** |
| **Hualien County** | **120** | **114** | **105** | **109** | **100** | **82** | **91** | **83** | **79** | **73** | **72** | **93.5 ± 17.1** |

**Table S2** Probability distributions of air pollutant concentrations (LN(gm, gsd) denotes the lognormal distribution with a geometric mean (gm) and a geometric standard deviation (gsd))

| **Air pollutant** | **Unit** | **Taipei City** | **Hualien County** | **Taitung County** | **Pingtung County** |
| --- | --- | --- | --- | --- | --- |
| NO2 (Figure 2A) | ppb | LN(20.53, 1.18) | LN(9.60, 1.40) | LN(5.07, 1.26) | LN(8.78, 1.39) |
| NOX (Figure 2B) | ppb | LN(31.17, 1.20) | LN(12.55,1.35) | LN(7.49, 1.22) | LN(11.08, 1.35) |
| CO (Figure 2C) | ppm | LN(0.62, 1.17) | LN(0.39, 1.35) | LN(0.34, 1.20) | LN(0.33, 1.39) |
| PM2.5 (Figure 2D) | μg/m3 | LN(23.37, 1.33) | LN(17.23,1.43) | LN(12.04, 1.40) | LN(27.22, 1.57) |
| PM10 (Figure 2E) | μg/m3 | LN(41.96, 1.25) | LN(30.83, 1.25) | LN(27.56, 1.29) | LN(51.44, 1.41) |
